# Supplementary material
Source: PubMed Central journal article supplement (PMC3743502)
Supplement: supp_M113.462101_jbc.M113.462101-1.pdf [file supp_M113.462101_jbc.M113.462101-1.pdf]

## SUPPLEMENTAL FIGURE LEGENDS

**FIGURE S1. Initial full models for MEK6 and p38 $\alpha$  phosphorylation.** (A) ASK1 phosphorylation of MEK6 and (B) MEK6 phosphorylation of p38 $\alpha$  are depicted as detailed kinetic models. Each step of the cascade was represented by a series of reversible and irreversible steps. Initial reversible protein complexes leading to a catalytically competent interaction are followed by an irreversible phosphorylation step, then reversible dissociation and rebinding of the monophosphorylated substrate. The second phosphorylation step is similarly modeled leading to a final, doubly phosphorylated product.

**FIGURE S2. LC-MS/MS identification of p38 $\alpha$ /K53M phosphorylation intermediates.** p38 $\alpha$ /K53M was phosphorylated by MEK6/S\*T\*, proteolyzed with chymotrypsin and separated on a RP-C18 column (see Methods). Total ion trace shows separation of individual peptides (bottom). Extracted ion chromatographs of masses corresponding to doubly charged activation loop peptides (middle). MASCOT analysis of collision-induced dissociation generated peptide fragments for peptide identification (top).

**FIGURE S3. Sequence Alignment of MAPKs with ERK3** Activation loops of p38 $\alpha$ , ERK2 and JNK are aligned with phosphorylation sites shown in red. S189, the activating phosphorylation site of ERK3, aligns with T180 of p38 $\alpha$  and T183 of ERK2.

## SUPPLEMENTAL TABLES

**Table S1 Proteolytically-derived phosphorylation site peptides observed by LC-MS for indicated kinases**

| Kinase       | Protease     | Peptide                 | Mass   | Charge |
|--------------|--------------|-------------------------|--------|--------|
| MEK6         | Chymotrypsin | LVDSVAKTIDAGCRPY        | 840.6  | 2      |
|              |              | LVDSVAKT*IDAGCRPY       | 880.6  | 2      |
|              |              | LVDS*VAKTIDAGCRP        | 880.6  | 2      |
|              |              | LVDS*VAKT*IDAGCRP       | 920.3  | 2      |
| p38 $\alpha$ | Trypsin      | HTDDEMTGYVATR           | 748.6  | 2      |
|              |              | HTDDEMTGY*VATR          | 788.6  | 2      |
|              |              | HTDDEMT*GYVATR          | 788.6  | 2      |
|              |              | HTDDEMT*GY*VATR         | 828.6  | 2      |
| ATF2         | Trypsin      | NDSVIVADQTPTPTR         | 807.6  | 2      |
|              |              | NDSVIVADQT*PTPTR        | 847.6  | 2      |
|              |              | NDSVIVADQTPT*PTR        | 847.6  | 2      |
|              |              | NDSVIVADQT*PT*PTR       | 887.6  | 2      |
|              |              | FGPAR NDSVIVADQTPTPTR   | 1072.8 | 2      |
|              |              | FGPAR NDSVIVADQT*PTPTR  | 1112.8 | 2      |
|              |              | FGPAR NDSVIVADQTPT*PTR  | 1112.8 | 2      |
|              |              | FGPAR NDSVIVADQT*PT*PTR | 1152.8 | 2      |

**Table S2 Equations used in final models.**

(A) Differential equations used in modeling ASK1 phosphorylation of MEK6.

$$\begin{aligned}
 d[\text{ASK1}]/dt &= -k_1[\text{ASK1}][\text{MEK6ST}] - k_2[\text{ASK1}][\text{MEK6ST}] + k_3[\text{ASK1\_MEK6STbindT}] + k_4[\text{ASK1\_MEK6STbindS}] - \\
 &\quad k_5[\text{ASK1}][\text{MEK6ST}^*] - k_6[\text{ASK1}][\text{MEK6S}^*T] + k_7[\text{ASK1\_MEK6ST}^*] + k_8[\text{ASK1\_MEK6S}^*T] + \\
 &\quad k_9[\text{ASK1\_MEK6STbindT}] \\
 d[\text{MEK6ST}]/dt &= -k_1[\text{ASK1}][\text{MEK6ST}] - k_2[\text{ASK1}][\text{MEK6ST}] \\
 d[\text{ASK1\_MEK6STbindT}]/dt &= k_1[\text{ASK1}][\text{MEK6ST}] - k_3[\text{ASK1\_MEK6STbindT}] - k_9[\text{ASK1\_MEK6STbindT}] \\
 d[\text{ASK1\_MEK6STbindS}]/dt &= k_2[\text{ASK1}][\text{MEK6ST}] - k_4[\text{ASK1\_MEK6STbindS}] \\
 d[\text{MEK6ST}^*]/dt &= k_3[\text{ASK1\_MEK6STbindT}] - k_5[\text{ASK1}][\text{MEK6ST}^*] \\
 d[\text{MEK6S}^*T]/dt &= k_4[\text{ASK1\_MEK6STbindS}] - k_6[\text{ASK1}][\text{MEK6S}^*T] \\
 d[\text{ASK1\_MEK6ST}^*]/dt &= k_5[\text{ASK1}][\text{MEK6ST}^*] - k_7[\text{ASK1\_MEK6ST}^*] \\
 d[\text{ASK1\_MEK6S}^*T]/dt &= k_6[\text{ASK1}][\text{MEK6S}^*T] - k_8[\text{ASK1\_MEK6S}^*T] \\
 d[\text{MEK6S}^*T^*]/dt &= k_7[\text{ASK1\_MEK6ST}^*] + k_8[\text{ASK1\_MEK6S}^*T] + k_9[\text{ASK1\_MEK6STbindT}]
 \end{aligned}$$

(B) Differential equations used in modeling MEK6 phosphorylation of p38 $\alpha$ .  $k_7$  was introduced to account for a small fraction of each unphosphorylated or partially phosphorylated p38 $\alpha$  species becoming inactive to account for the persistence of these species through the time course.

$$\begin{aligned}
 d[\text{ASK1}]/dt &= -k_1[\text{ASK1}][\text{MEK6ST}] - k_2[\text{ASK1}][\text{MEK6ST}] + k_3[\text{ASK1\_MEK6STbindT}] + k_4[\text{ASK1\_MEK6STbindS}] - \\
 &\quad k_5[\text{ASK1}][\text{MEK6ST}^*] - k_6[\text{ASK1}][\text{MEK6S}^*T] + k_7[\text{ASK1\_MEK6ST}^*] + k_8[\text{ASK1\_MEK6S}^*T] + \\
 &\quad k_9[\text{ASK1\_MEK6STbindT}] \\
 d[\text{MEK6ST}]/dt &= -k_1[\text{ASK1}][\text{MEK6ST}] - k_2[\text{ASK1}][\text{MEK6ST}] \\
 d[\text{ASK1\_MEK6STbindT}]/dt &= k_1[\text{ASK1}][\text{MEK6ST}] - k_3[\text{ASK1\_MEK6STbindT}] - k_9[\text{ASK1\_MEK6STbindT}] \\
 d[\text{ASK1\_MEK6STbindS}]/dt &= k_2[\text{ASK1}][\text{MEK6ST}] - k_4[\text{ASK1\_MEK6STbindS}] \\
 d[\text{MEK6ST}^*]/dt &= k_3[\text{ASK1\_MEK6STbindT}] - k_5[\text{ASK1}][\text{MEK6ST}^*] \\
 d[\text{MEK6S}^*T]/dt &= k_4[\text{ASK1\_MEK6STbindS}] - k_6[\text{ASK1}][\text{MEK6S}^*T] \\
 d[\text{ASK1\_MEK6ST}^*]/dt &= k_5[\text{ASK1}][\text{MEK6ST}^*] - k_7[\text{ASK1\_MEK6ST}^*] \\
 d[\text{ASK1\_MEK6S}^*T]/dt &= k_6[\text{ASK1}][\text{MEK6S}^*T] - k_8[\text{ASK1\_MEK6S}^*T] \\
 d[\text{MEK6S}^*T^*]/dt &= k_7[\text{ASK1\_MEK6ST}^*] + k_8[\text{ASK1\_MEK6S}^*T] + k_9[\text{ASK1\_MEK6STbindT}]
 \end{aligned}$$

**Table S3 Derived kinetic constants based on experimentally observed progress curves of ASK1 phosphorylation of MEK6/K82M**

| Parameter      | Value                                    | Std. Error | 90% confidence interval |
|----------------|------------------------------------------|------------|-------------------------|
| $k_1^\ddagger$ | $2.0 \mu\text{M}^{-1} \text{min}^{-1}$   | NA         | NA                      |
| $k_2$          | $0.044 \mu\text{M}^{-1} \text{min}^{-1}$ | 0.0092     | 0.003 – 0.057           |
| $k_3$          | $11 \text{min}^{-1}$                     | 0.75       | 10 – 12                 |
| $k_4$          | $0.72 \text{min}^{-1}$                   | 0.24       | 0.47 – 1.7              |
| $k_5$          | $2.5 \mu\text{M}^{-1} \text{min}^{-1}$   | 0.11       | 2.3 – 2.7               |
| $k_6$          | $4.7 \mu\text{M}^{-1} \text{min}^{-1}$   | 1.3        | 3.5 – 6.6               |
| $k_7$          | $5.3 \text{min}^{-1}$                    | 1.2        | 3.7 – 8.5               |
| $k_8$          | $0.011 \text{min}^{-1}$                  | 0.0086     | 0.00002 – 0.024         |
| $k_9$          | $4.6 \text{min}^{-1}$                    | 0.35       | 4.1 – 5.2               |

$^\ddagger k_1$  was determined by trial and error, and is similar to the approximate turnover for loss of MEK6/ST.

**Table S4 Derived kinetic constants based on experimentally observed progress curves of MEK6 phosphorylation of p38 $\alpha$ /K53M**

| Parameter                   | Value                                   | Std. Error | 90% confidence interval |
|-----------------------------|-----------------------------------------|------------|-------------------------|
| k <sub>1</sub> <sup>§</sup> | 154 $\mu\text{M}^{-1} \text{min}^{-1}$  | NA         | NA                      |
| k <sub>2</sub>              | 31 $\mu\text{M}^{-1} \text{min}^{-1}$   | 1.7        | 28 - 34                 |
| k <sub>3</sub>              | 101 $\mu\text{M}^{-1} \text{min}^{-1}$  | 8.9        | 87 - 116                |
| k <sub>4</sub>              | 15 $\text{min}^{-1}$                    | 4.1        | 9.8 - 23                |
| k <sub>5</sub>              | 6.6 $\text{min}^{-1}$                   | 0.43       | 6.0 - 7.3               |
| k <sub>6</sub>              | 44 $\mu\text{M}^{-1} \text{min}^{-1}$   | 5.6        | 36 - 54                 |
| k <sub>7</sub> <sup>‡</sup> | 0.03 $\mu\text{M}^{-1} \text{min}^{-1}$ | NA         | NA                      |

<sup>§</sup> A range of values for k<sub>1</sub> fit the model; we picked the lowest, which put k<sub>1</sub> midrange of values reported in the literature (1). <sup>‡</sup> Rate of p38 $\alpha$  species inactivation.

#### SUPPLEMENTAL REFERENCES

1. Fujioka, A., Terai, K., Itoh, R. E., Aoki, K., Nakamura, T., Kuroda, S., Nishida, E., and Matsuda, M. (2006) Dynamics of the Ras/ERK MAPK cascade as monitored by fluorescent probes. *J Biol Chem* **281**, 8917-8926

A

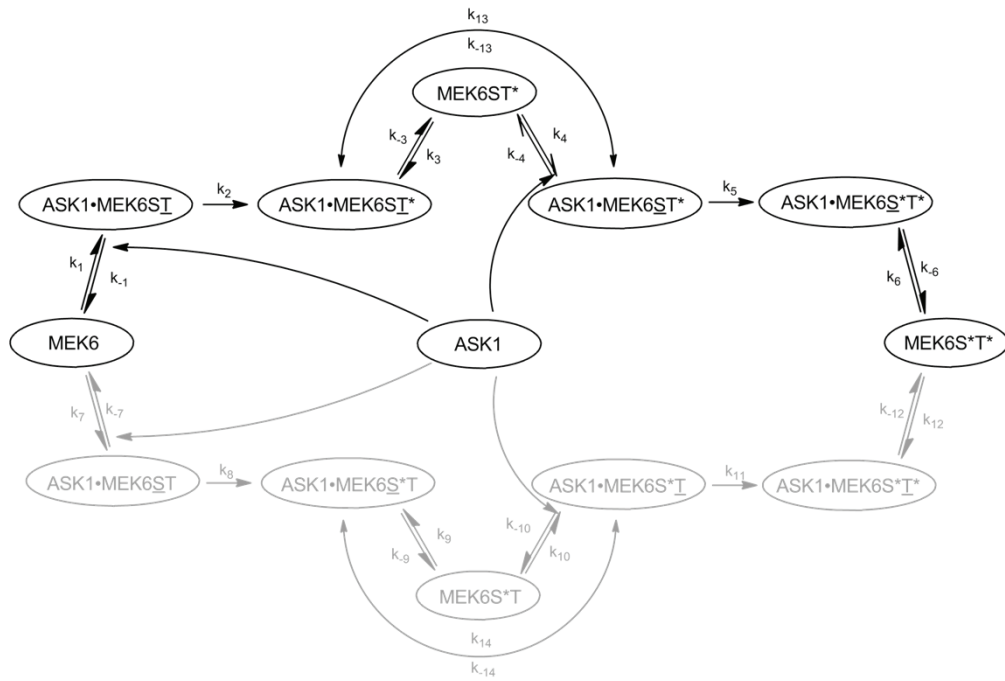

B

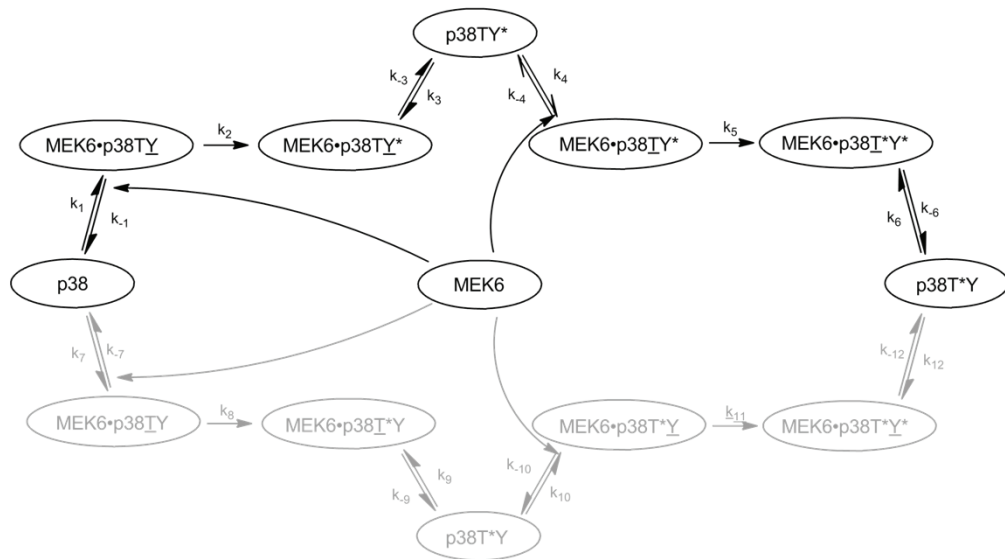

Figure S1

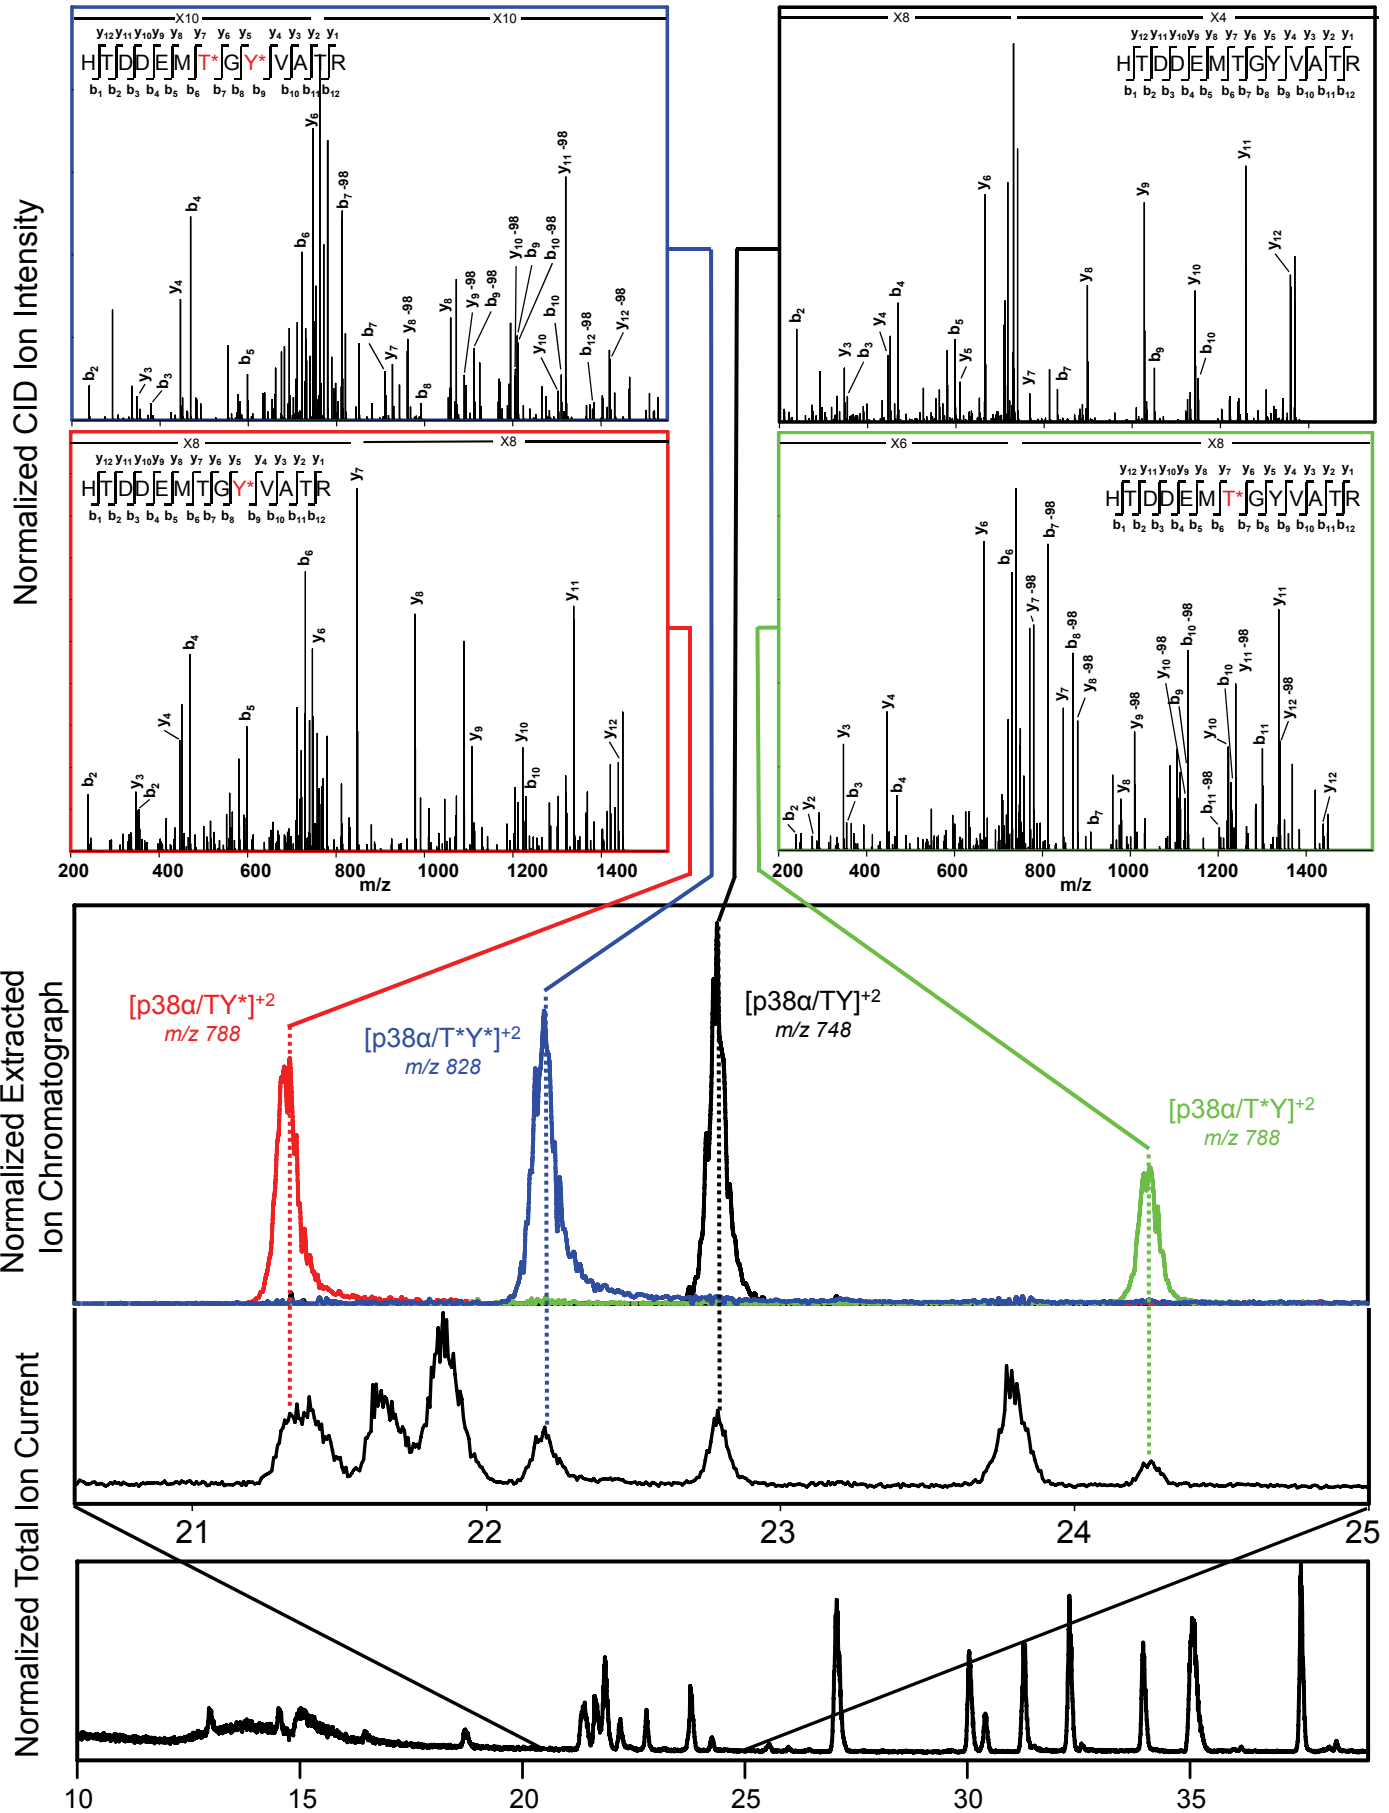

Figure S2

p38 $\alpha$  168DFGLARHTDDE-----MTGYVATRWRAP<sup>E192</sup>  
ERK2 165DFGLARVADPDHDHTGFLTEYVATRWRAP<sup>E195</sup>  
JNK2 168DFGLARTACTNF----MMTPYVVTRYR<sup>AP<sup>E195</sup></sup>  
ERK3 171DFGLARIMDPHYSHKGHLSEGLVTKWYR<sup>SP<sup>R201</sup></sup>

## Figure S3
